# Supplementary material
Source: HighWire-hosted journal article supplement (https://jnis.bmj.com/content/12/1/87)
Supplement: inline-supplementary-material-1 [file inline-supplementary-material-1.docx]

**SUPPLEMENTARY MATERIAL**


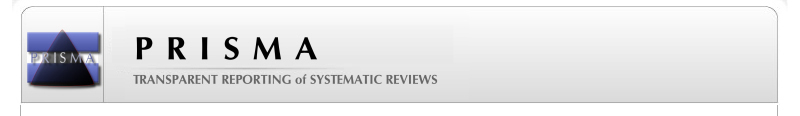
 PRISMA 2009 Flow Diagram

Records identified through database searching
(PubMed n = 84, Embase n = 82, Cochrane n = 4)

Studies included in quantitative synthesis (meta-analysis)
(n = 7)

Studies included in qualitative synthesis
(n = 7)

Full-text articles excluded, with reasons
(n = 1)

Full-text articles assessed for eligibility
(n = 8)

Records excluded
(n = 127)

Records screened
(n = 135)

Records after duplicates removed
(n = 135)

Additional records identified through other sources
(n = 0)

## Identification

## Eligibility

## Included

## Screening
